# Supplementary material for: The new dicyanoruthenium(iii) building block with 2′-hydroxyacetophenone imine for heterobimetallic complexes
Source: Royal Society of Chemistry journal article supplement (doi:10.1039/c5ra15752h), 2015-01-01
Supplement: c5ra15752h1.pdf [file c5ra15752h1.pdf]

Electronic Supporting Information

**The New Dicyanoruthenium(III) Building Block with 2'-  
Hydroxyacetophenone Imine for Heterobimetallic Complexes**

Jing Ru,<sup>a</sup> Tian-Xiang Zong,<sup>a</sup> Jing-Yuan Ge,<sup>a</sup> Min-Xia Yao,<sup>b</sup> and Jing-Lin Zuo<sup>\*a</sup>

*<sup>a</sup> State Key Laboratory of Coordination Chemistry, School of Chemistry and Chemical Engineering, Collaborative Innovation Center of Advanced Microstructures, Nanjing University, Nanjing 210093, P. R. China*

*<sup>b</sup> School of Science, Nanjing University of Technology, Nanjing 210009, P. R. China*

---

\* To whom correspondence should be addressed. Email: zuojl@nju.edu.cn; Fax: +86-25-83314502.  
Nanjing University.

## Caption of Content

1. **Figure S1.** The 2D layer of **4** constructed from the interchain  $\pi$ - $\pi$  interactions (rose dashes) between the aromatic rings of the nappa ligand.
2. **Figure S2.**  $1/\chi_M(\blacksquare)$  for complex **1** at 1 kOe.
3. **Figure S3.** Field dependence of the magnetization for **1**, the lines represent the Brillouin function that correspond to  $S = 1/2+2$  with  $g = 2.0$ .
4. **Figure S4.** Field dependence of the magnetization for **2**, the lines represent the Brillouin function that correspond to  $S = 1/2+2$  with  $g = 2.0$ .
5. **Figure S5.** Temperature dependence of the in-phase  $\chi'$  (top) and out-of-phase  $\chi''$  (bottom) at different frequencies in 2 Oe ac field oscillating at 666 Hz with zero applied dc field for **3**.
6. **Figure S6.**  $1/\chi_M$  vs  $T$  ( $\blacksquare$ ) for complex **4** at 1 kOe.
7. **Figure S7.** Thermal dependence of the magnetic susceptibility at  $T \leq 8$  K for complex **4** at 1 kOe.
8. **Figure S8.**  $1/\chi_M$  vs  $T$  ( $\blacksquare$ ) for complex **5** at 1 kOe.
9. **Figure S9.** Field dependence of the magnetization for **5**, the lines represent the Brillouin function that correspond to  $S = 1/2+2$  with  $g = 2.0$ .
10. **Figure S10.** IR spectra of complexes **1- 5**.

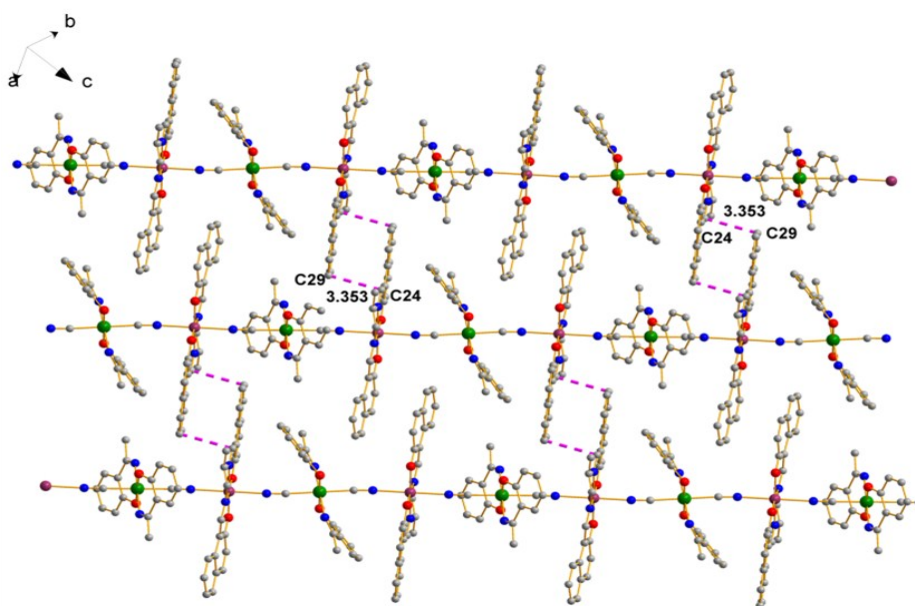

**Figure S1.** The 2D layer of **4** constructed from the interchain  $\pi$ - $\pi$  interactions (rose dashes) between the aromatic rings of the nappa ligand.

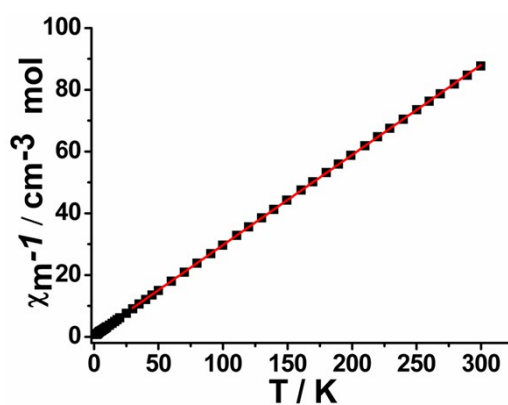

**Figure S2.**  $1/\chi_M(\blacksquare)$  for complex **1** at 1kOe.

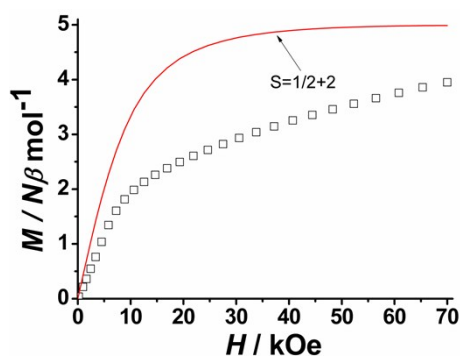

**Figure S3.** Field dependence of the magnetization for **1**, the lines represent the Brillouin function that correspond to  $S = 1/2+2$  with  $g = 2.0$ .

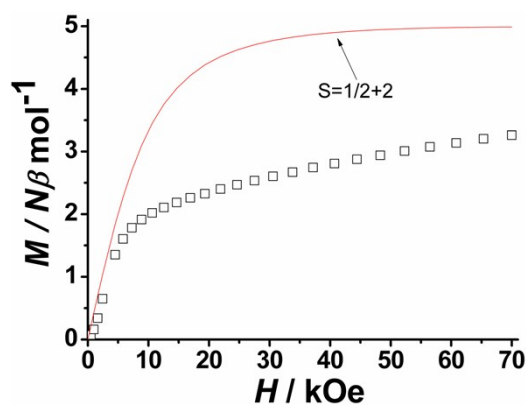

**Figure S4.** Field dependence of the magnetization for **2**, the lines represent the Brillouin function that correspond to  $S = 1/2 + 2$  with  $g = 2.0$ .

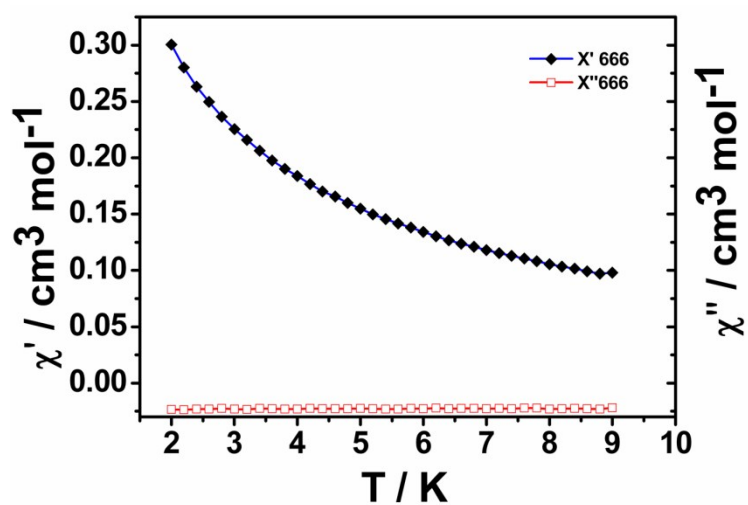

**Figure S5.** Temperature dependence of the in-phase  $\chi'$  (top) and out-of-phase  $\chi''$  (bottom) at different frequencies in 2 Oe ac field oscillating at 666 Hz with zero applied dc field for **3**.

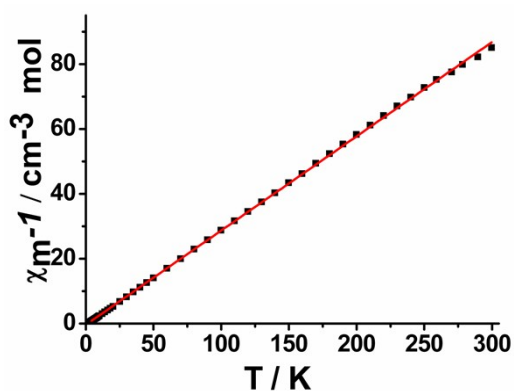

**Figure S6.**  $1/\chi_M$  (■) vs  $T$  for complex **4** at 1 kOe

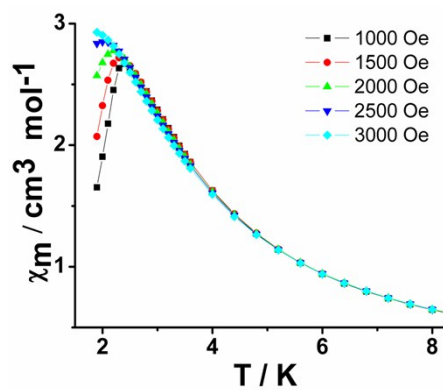

**Figure S7.** Thermal dependence of the magnetic susceptibility at  $T \leq 8$  K for complex **4** at 1 kOe.

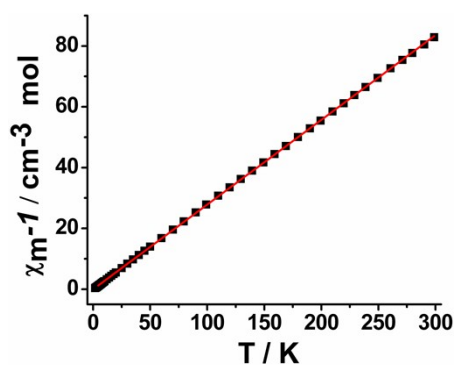

**Figure S8.**  $1/\chi_M(\blacksquare)$  vs  $T$  for complex **5** at 1 kOe.

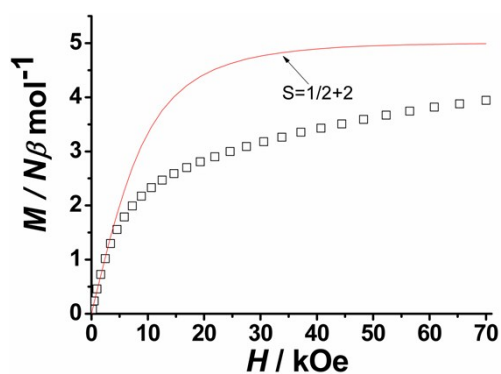

**Figure S9.** Field dependence of the magnetization for **5**, the lines represent the Brillouin function that correspond to  $S = 1/2+2$  with  $g = 2.0$ .

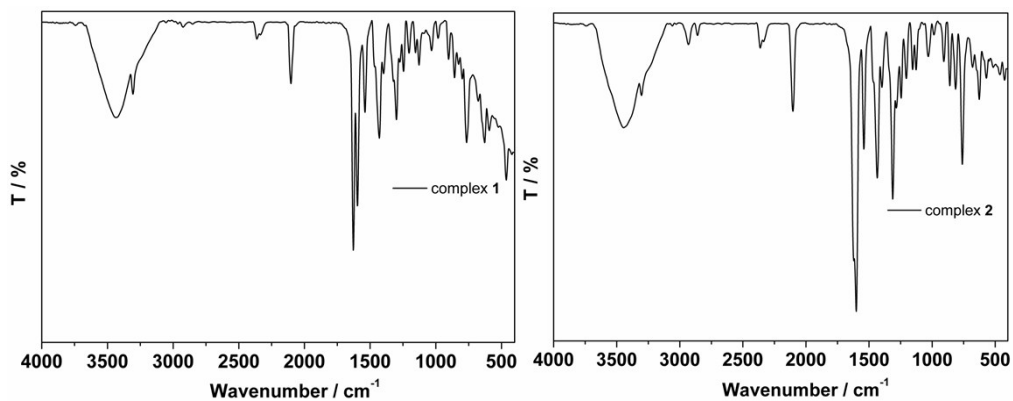

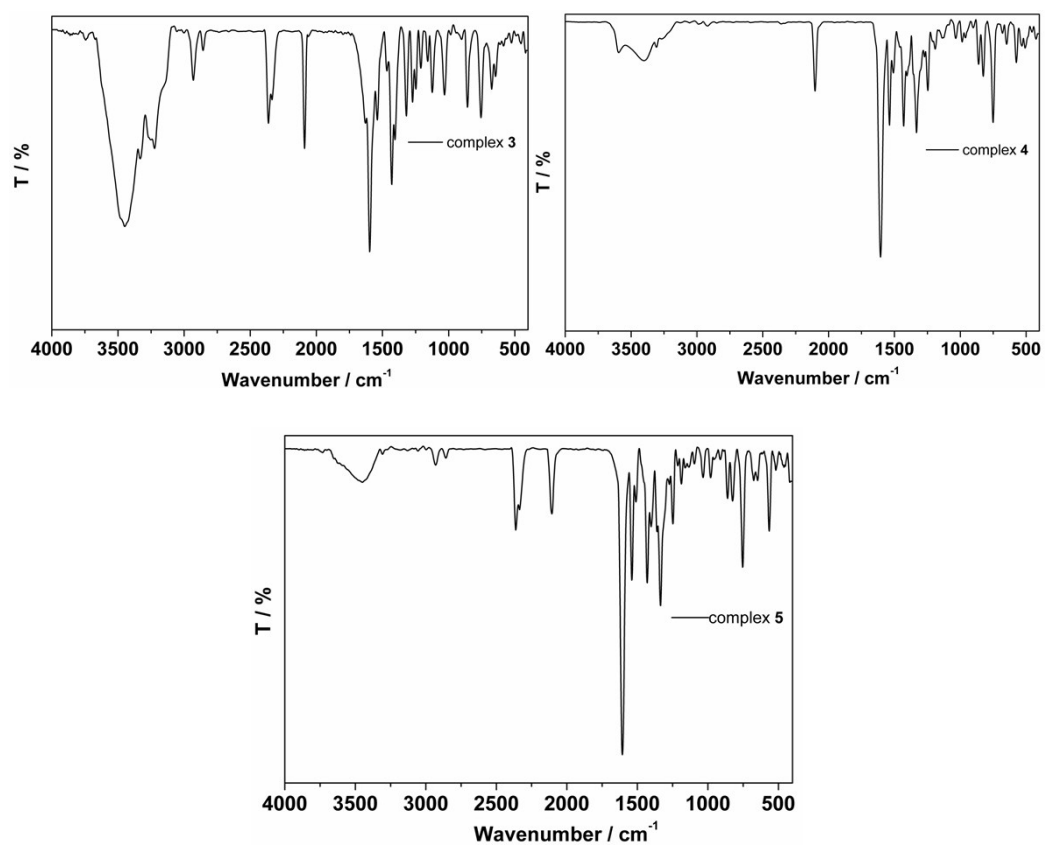

**Figure S10.** IR spectra for complexes 1-5.
